# Supplementary material for: Tumour PD-L1 Expression in Small-Cell Lung Cancer: A Systematic Review and Meta-Analysis
Source: MDPI journal article supplement (doi:10.3390/cells9112393), 2020-10-31
Supplement: s1 [file s1]

Supplementary Figures

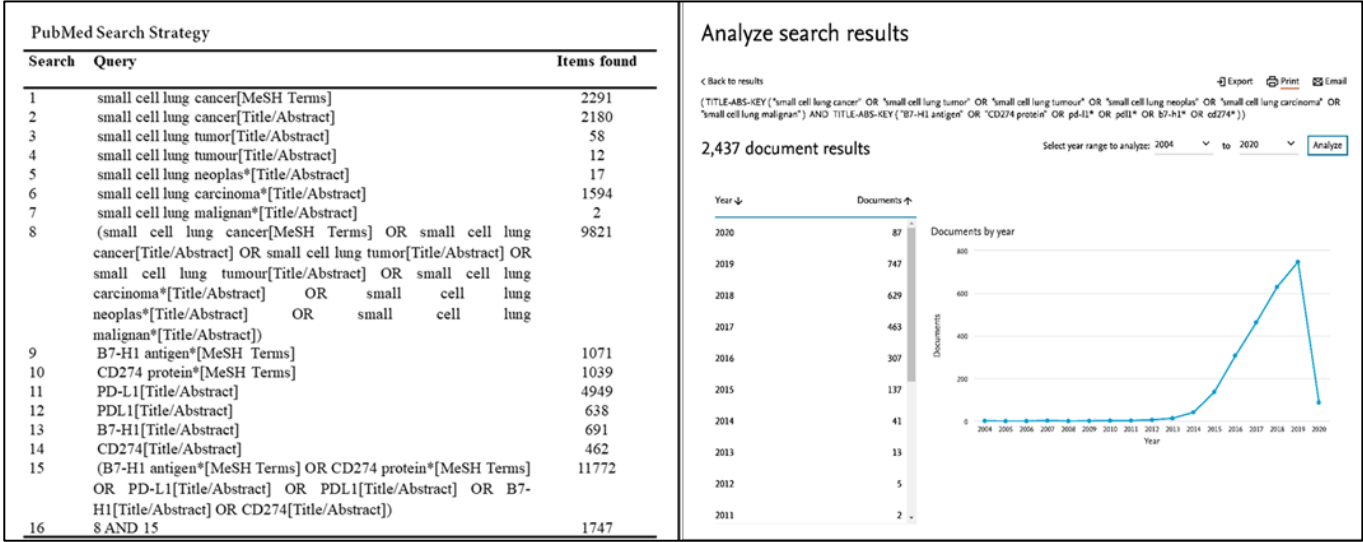

Figure S1: Search strategy -PubMed/Scopus

| Author (year)                  | Representative sample of relevant population | Selection of the non-exposed cohort | Ascertainment of exposure | Demonstration that outcome of study does not present at the start of the study | Design of analysis controlled for cofounders | Assessment of outcome | Follow-upadequate for outcomes to occur | Quality Score |
|--------------------------------|----------------------------------------------|-------------------------------------|---------------------------|--------------------------------------------------------------------------------|----------------------------------------------|-----------------------|-----------------------------------------|---------------|
| Ishii et al., 2015             | *                                            | *                                   | *                         | **                                                                             |                                              |                       |                                         | 5             |
| Komiya and Madan, 2015         |                                              | *                                   | *                         | **                                                                             |                                              |                       |                                         | 4             |
| Schultheis et al., 2015        |                                              | *                                   | *                         | **                                                                             |                                              | *                     |                                         | 6             |
| Yu et al., 2016                | *                                            | *                                   | *                         | **                                                                             | *                                            | *                     | *                                       | 8             |
| Takada et al., 2016            |                                              | *                                   | *                         | **                                                                             |                                              | *                     |                                         | 5             |
| Antonia et al 2016             | **                                           | *                                   | **                        | **                                                                             | **                                           | **                    | *                                       | 12            |
| Berghoff et al., 2016          | *                                            | *                                   | *                         | **                                                                             |                                              | **                    | *                                       | 7             |
| Miao et al., 2017              |                                              | *                                   | *                         | **                                                                             |                                              | *                     | *                                       | 6             |
| Chang et al., 2017             | *                                            |                                     | *                         | **                                                                             |                                              | **                    | *                                       | 7             |
| Inamura et al., 2017           |                                              | *                                   | *                         | **                                                                             |                                              | *                     | *                                       | 6             |
| Tsuruoka et al., 2017          |                                              | *                                   | *                         | **                                                                             | *                                            | **                    | *                                       | 8             |
| Ott et al, 2017                | *                                            | *                                   | **                        | **                                                                             | **                                           | **                    | **                                      | 12            |
| Yasuda et al, 2018             |                                              | *                                   |                           | **                                                                             |                                              | *                     |                                         | 4             |
| Bonanno et al., 2018           | *                                            | *                                   | *                         | **                                                                             | *                                            | *                     |                                         | 7             |
| Wang et al., 2018              |                                              | *                                   | *                         | **                                                                             | *                                            | *                     | *                                       | 6             |
| Ichiki et al., 2018            |                                              | *                                   | *                         | **                                                                             |                                              | **                    |                                         | 7             |
| Liu et al., 2018               |                                              | *                                   | *                         | **                                                                             | *                                            | **                    | *                                       | 8             |
| Gadgeel et al, 2018            |                                              | *                                   | **                        | **                                                                             | **                                           | **                    | **                                      | 11            |
| Chung et al., 2018             | *                                            | *                                   | *                         | **                                                                             | **                                           | *                     | *                                       | 8             |
| Kim et al., 2018               | *                                            | *                                   | *                         | **                                                                             | **                                           | *                     | *                                       | 8             |
| Xu et al., 2019                |                                              | *                                   | *                         | **                                                                             |                                              | **                    | *                                       | 7             |
| Zhao et al., 2019              | *                                            | *                                   | *                         | **                                                                             |                                              | **                    | *                                       | 9             |
| Carvajal-Hausdorf et al., 2019 |                                              | *                                   | *                         | **                                                                             | *                                            | *                     |                                         | 6             |
| Pujol et al., 2019             | **                                           | *                                   | **                        | **                                                                             | **                                           | **                    | **                                      | 13            |
| Sun et al., 2019               |                                              | *                                   | *                         | **                                                                             | *                                            | **                    | *                                       | 8             |
| Pas-Ares et al., 2019          | **                                           | *                                   | **                        | **                                                                             | **                                           | **                    | **                                      | 13            |
| Recket et al., 2020            | *                                            | *                                   | **                        | **                                                                             | **                                           | **                    | **                                      | 12            |

**Figure S2: Assessment of the quality of methodological characteristics on included studies utilising the Newcastle-Ottawa Scale (NOS) scale**  
**\*\*=criterion is satisfied; \*=criterion is partly satisfied; no \* =criterion is not satisfied or cannot be determined. Maximum quality score=16; 0–5 points were considered low quality, 5–9 points were considered medium quality and 10–16 points were considered as high quality.**

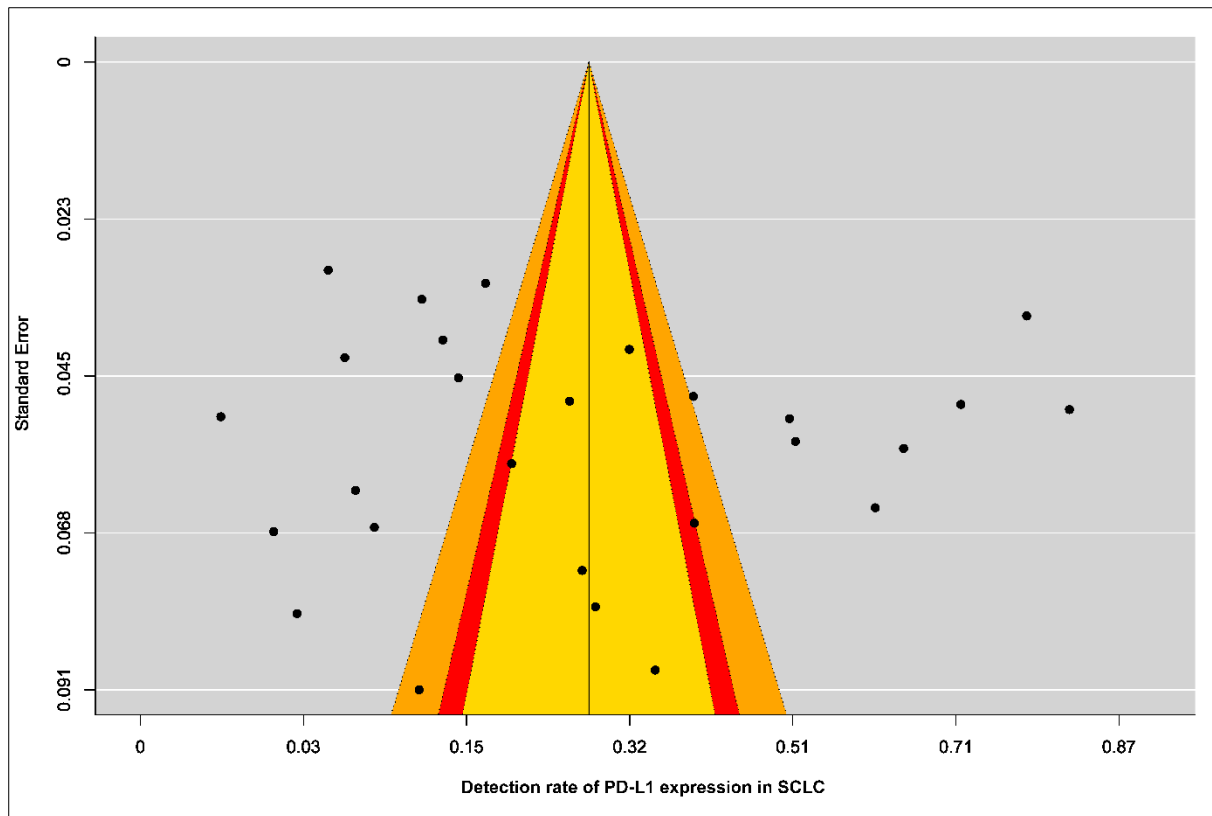

**Figure S3: Begg's funnel plots with 90% CI (gold), 95% CI (red) and 99% CI (orange) for publication bias testing for the prevalence of PD-L1 expression in SCLC.**

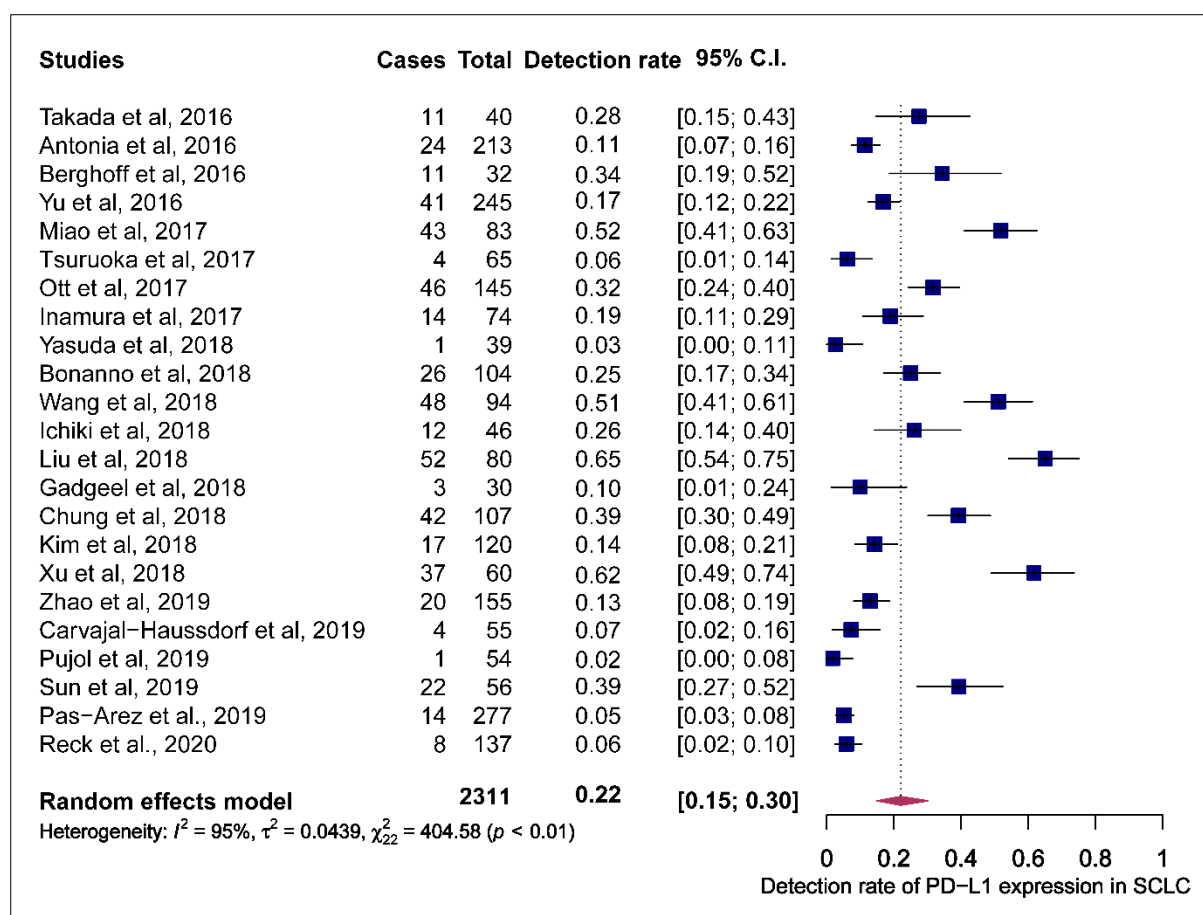

**Figure S4: Forest plot of studies reporting the detection rate of PD-L1 expression in SCLC after the leave-one-out sensitivity analysis to remove outliers. The PD-L1 detection rates and 95%CI of each study is represented with a horizontal line and the square area mirrors the weight of the study. A random-effect model was utilised.**

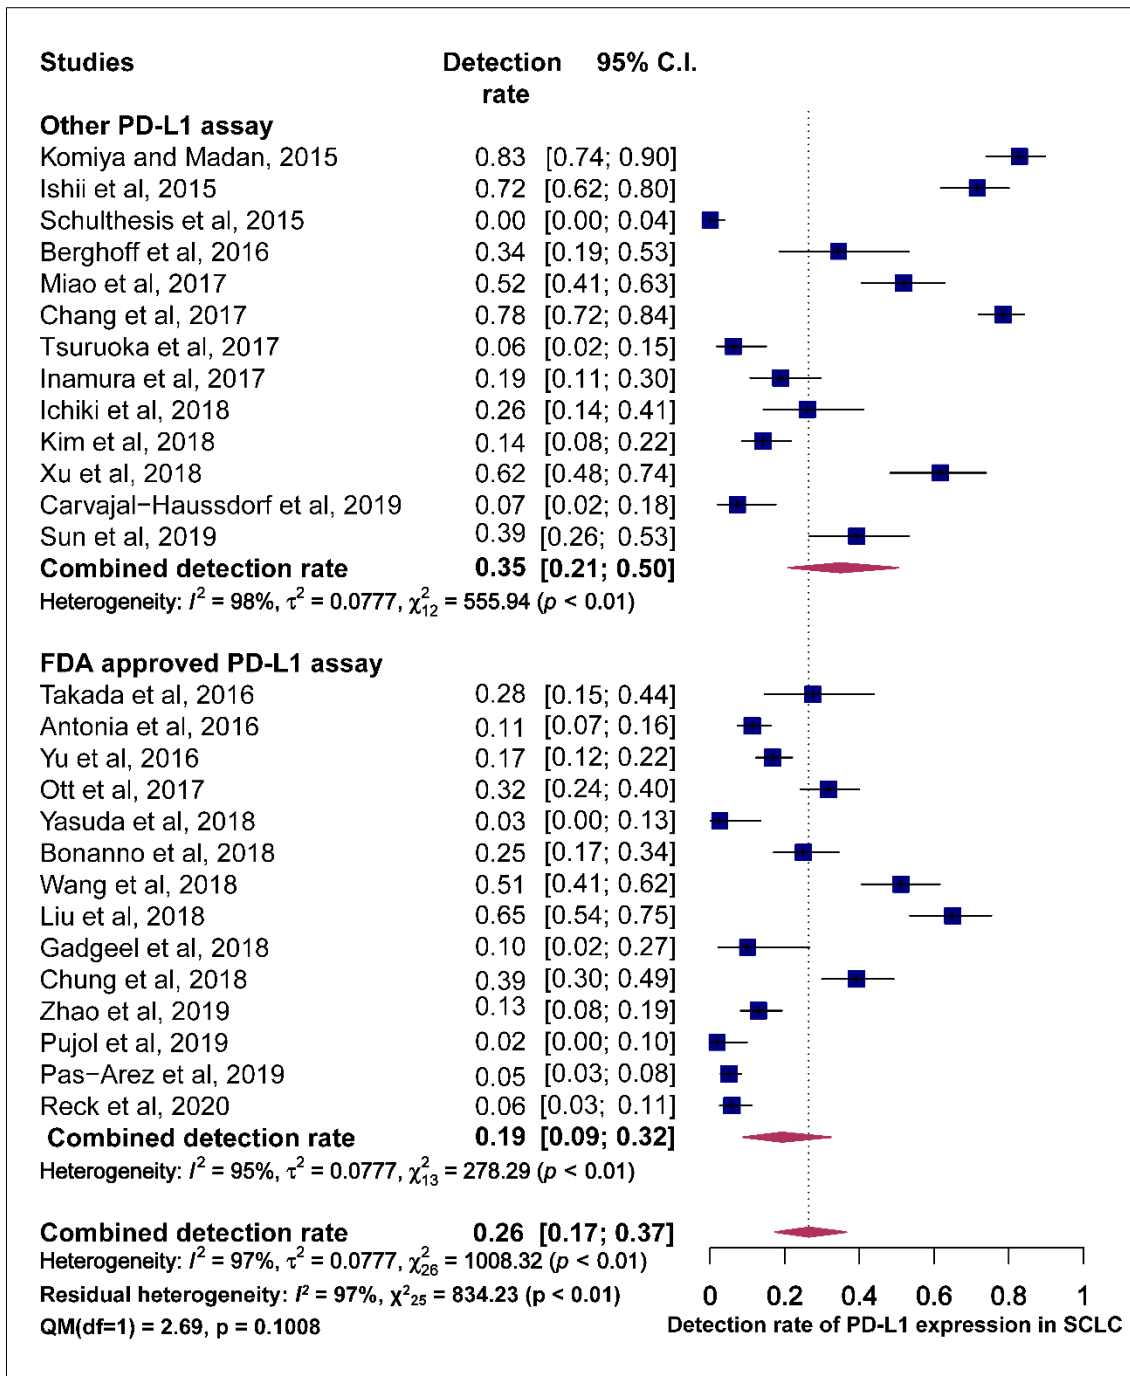

Figure S5: Forest plot of subgroup analysis of association between the use of FDA approved PD-L1 assays or not and prevalence of PD-L1 expression. The PD-L1 detection rates and 95%CI of each study is represented with a horizontal line and the square area mirrors the size effect of each study. A random-effect model was utilised.

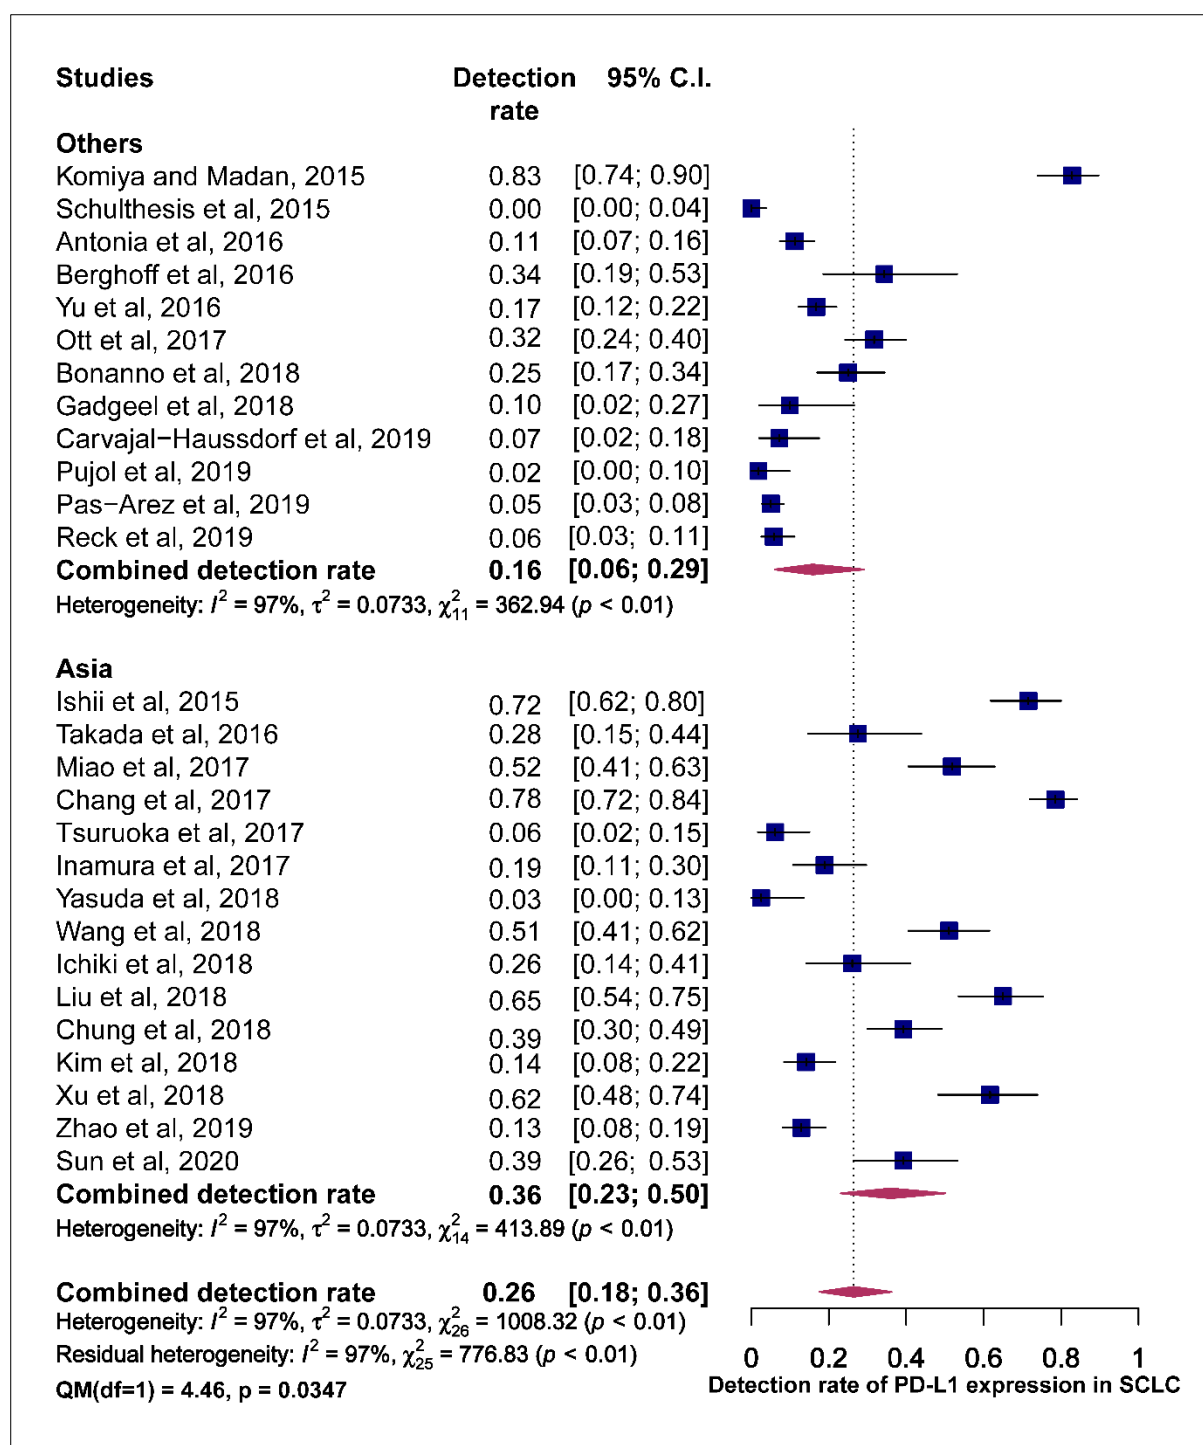

Figure S6: Forest plot of subgroup analysis of association between geographical distribution of published articles and prevalence of PD-L1 expression. The PD-L1 detection rates and 95%CI of each study is represented with a horizontal line and the square area mirrors the weight of the study. A random-effect model was utilised.

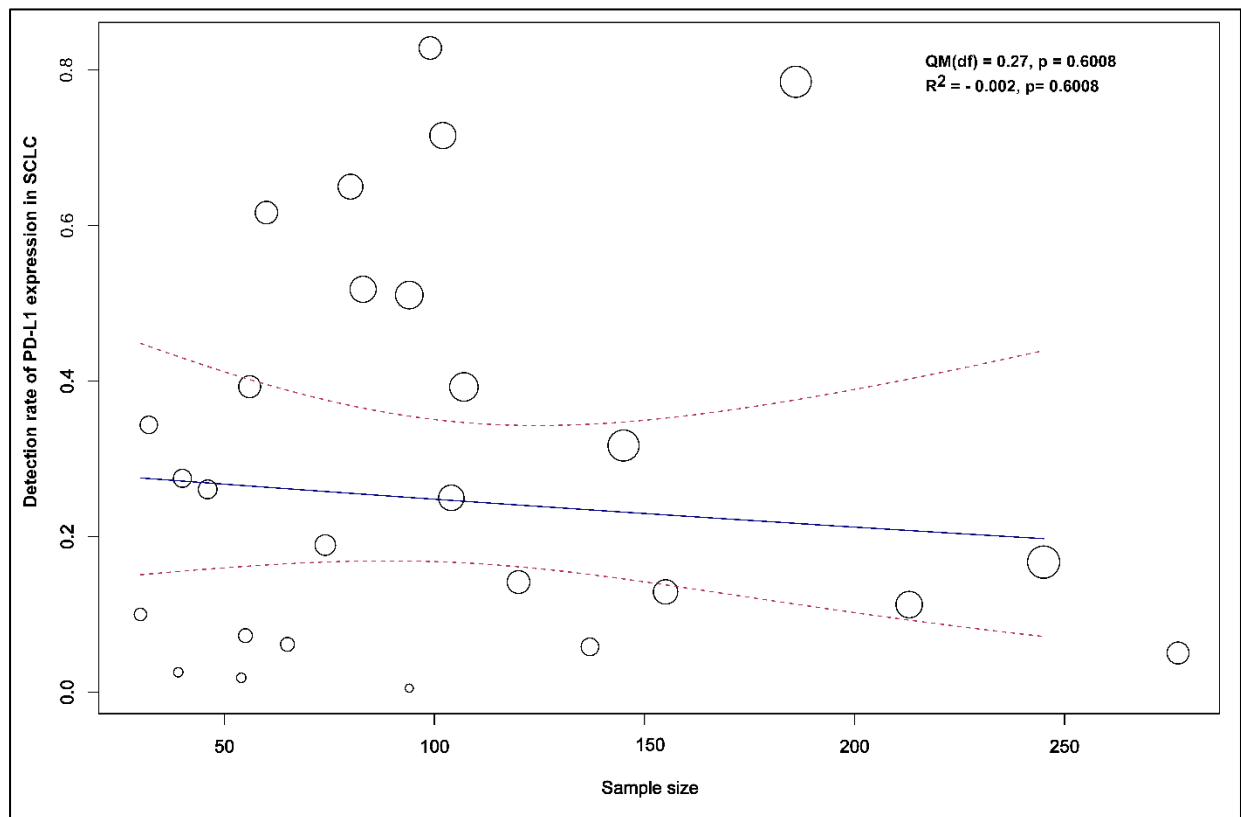

**Figure S7: Meta-regression plot showing the association of sample size with pooled estimate of the prevalence of PD-L1 expression. Blue line represents the regression line of best fit, the red lines represent the lower and upper 95% confidence intervals (Cis), Each open circle represents a study. The size of the circle indicates the precision of the effect estimate and the weight given to that study**

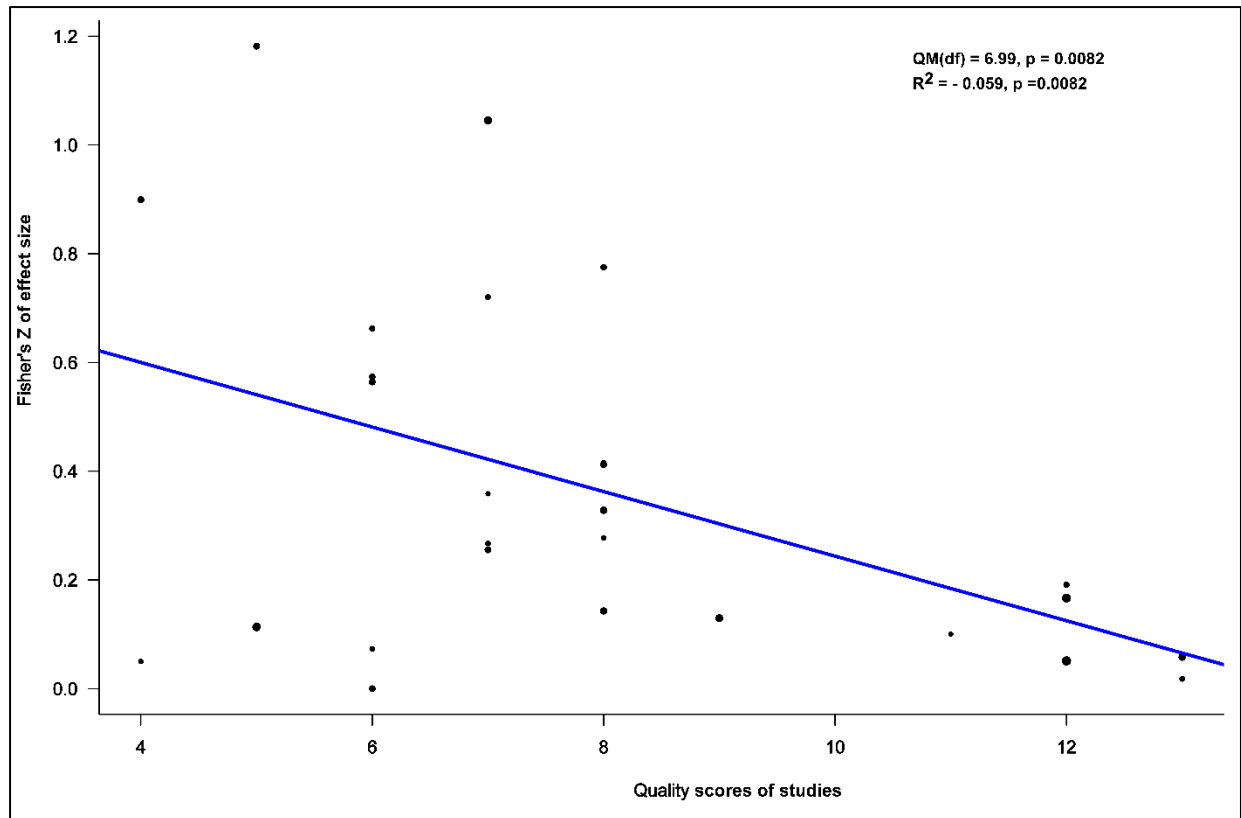

Figure S8: Meta-regression plot showing the association of quality scores of the study's methodological characteristics with pooled estimate of the prevalence of PD-L1 expression.



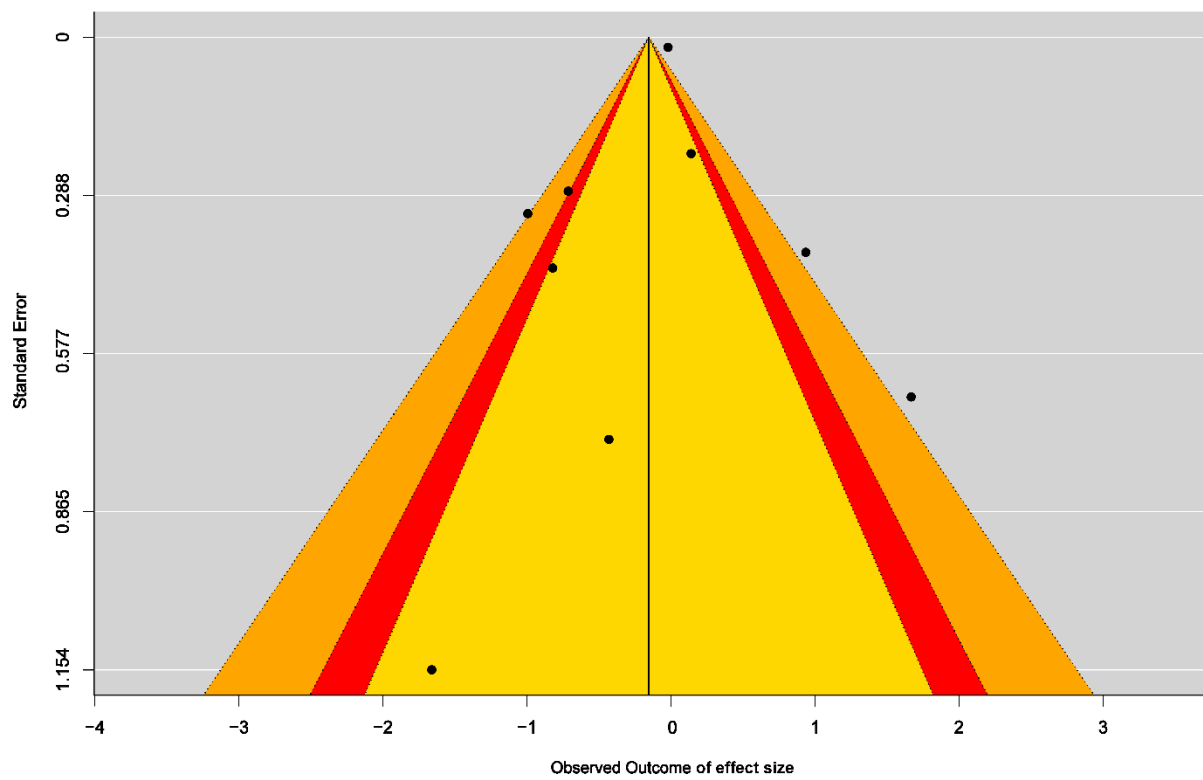

**Figure S9: Begg's funnel plots with 90% CI (gold), 95% CI (red) and 99% CI (orange) for publication bias testing for the prognosis of PD-L1 expression in SCLC**
